# Supplementary material for: Mantle-Derived Helium Emission near the Pohang EGS Site, South Korea: Implications for Active Fault Distribution
Source: Hindawi journal article supplement (doi:10.1155/2020/2359740), 2020-07-24
Supplement: f1 [file 2359740.f1.pdf]

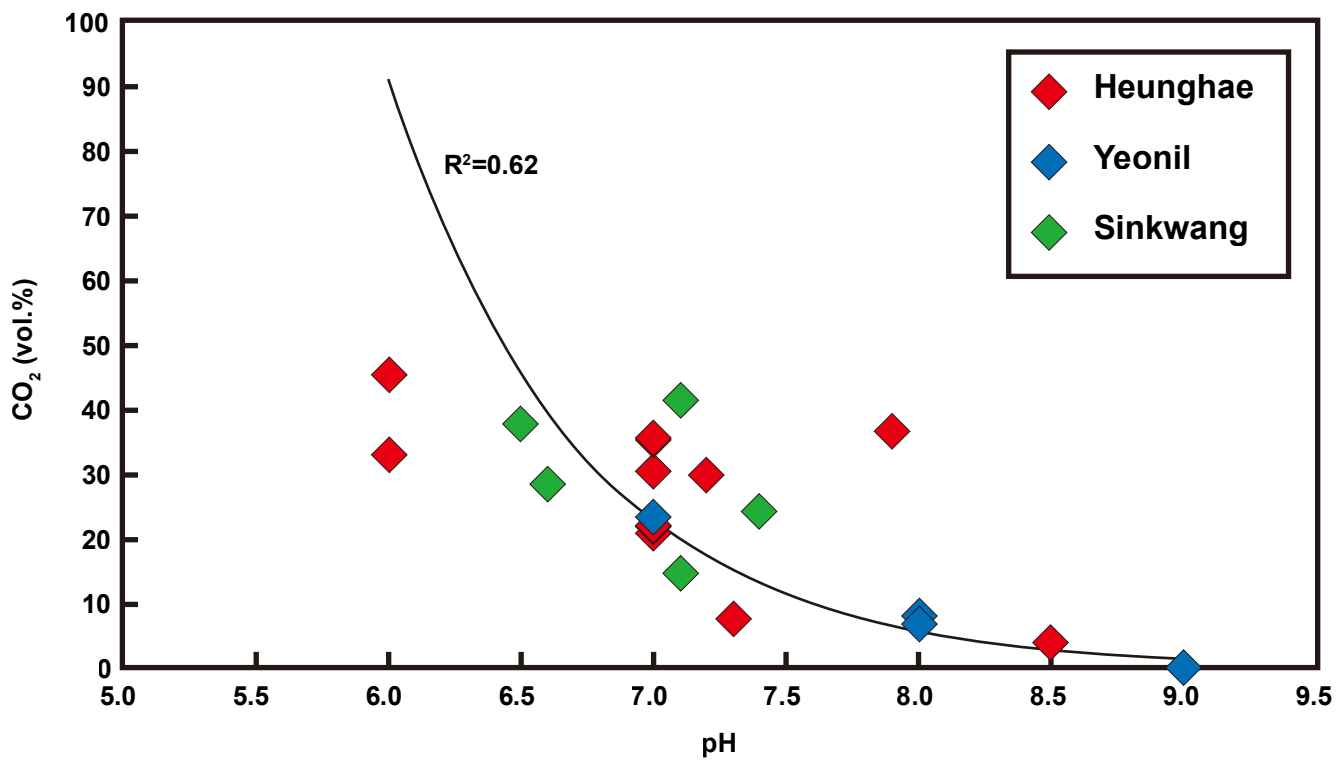

Figure S1: (a) Relative concentration of CO<sub>2</sub> and pH plot.

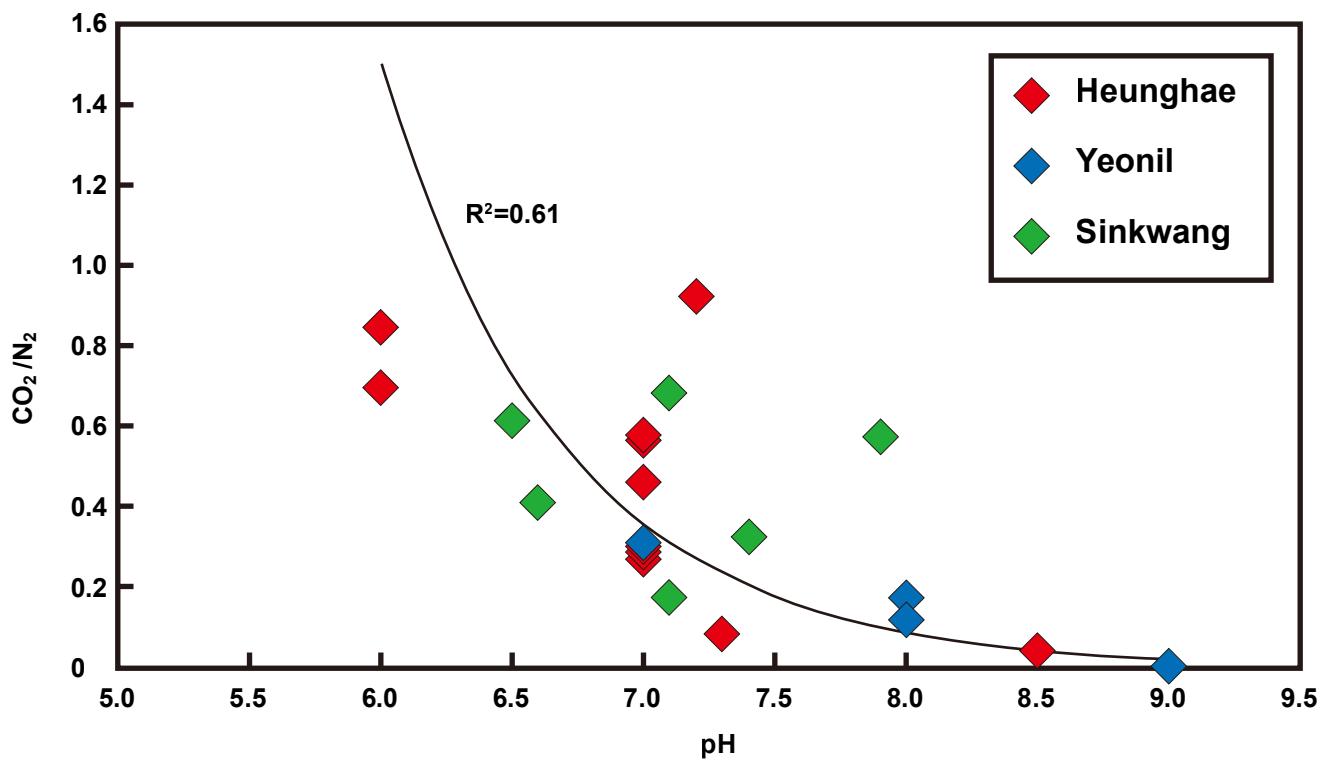

(b) CO<sub>2</sub>/N<sub>2</sub> and pH plot.

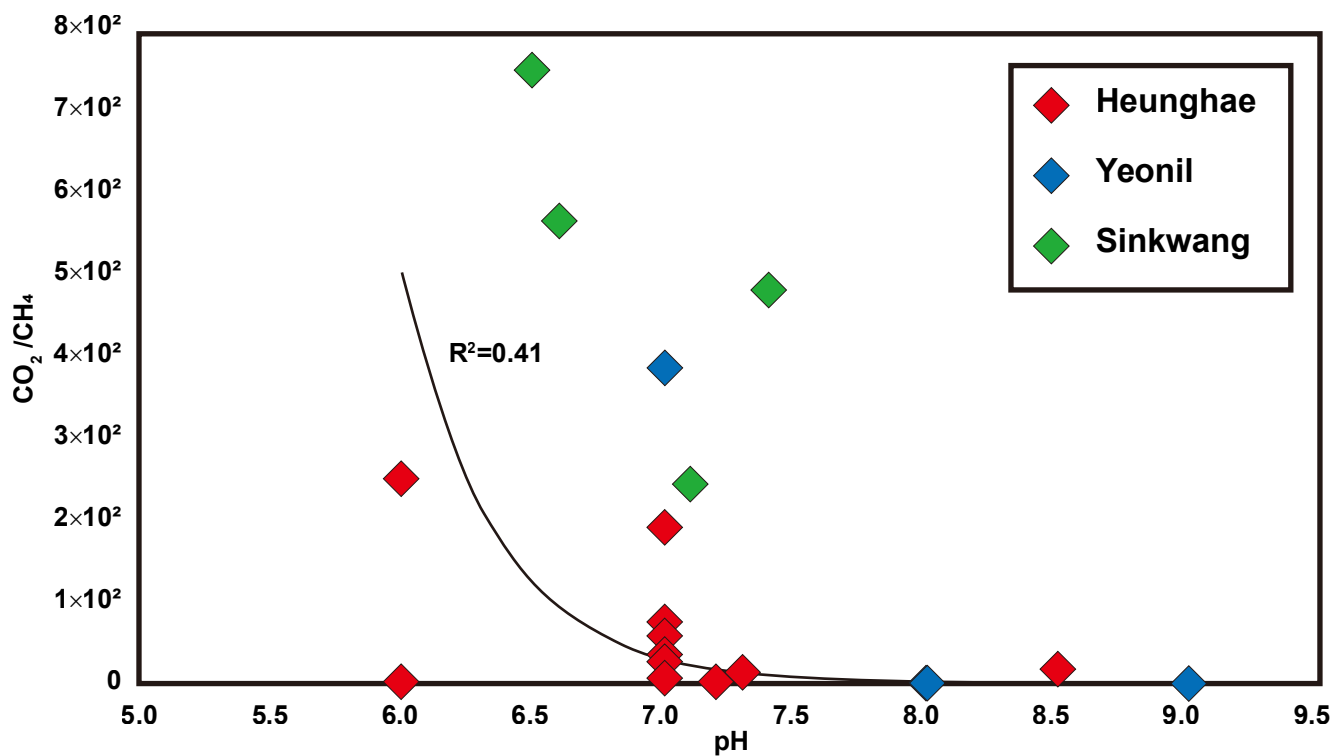

(c)  $\text{CO}_2/\text{CH}_4$  and pH plot.

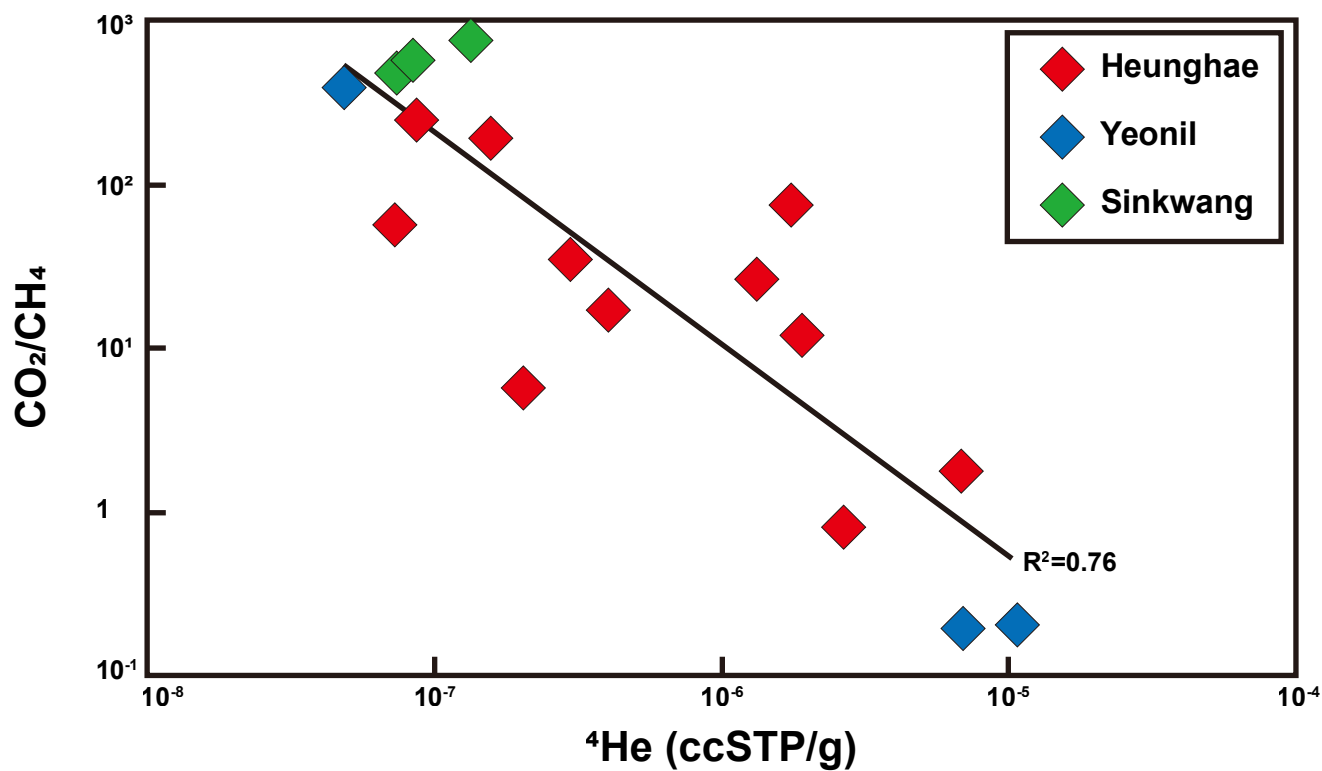

(d)  $\text{CO}_2/\text{CH}_4$  and concentration of  $^4\text{He}$  plot.

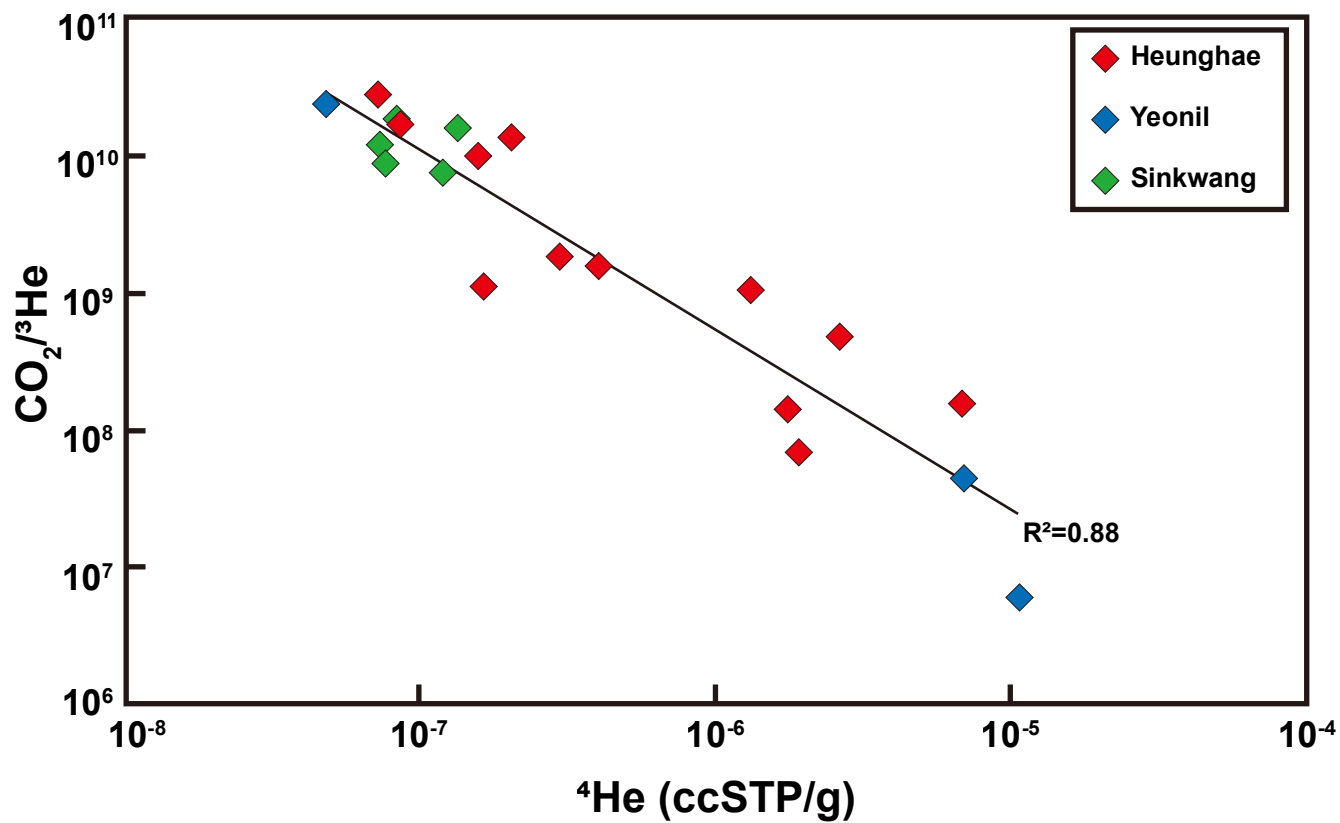

(e)  $\text{CO}_2/^3\text{He}$  and concentration of  $^4\text{He}$  plot.

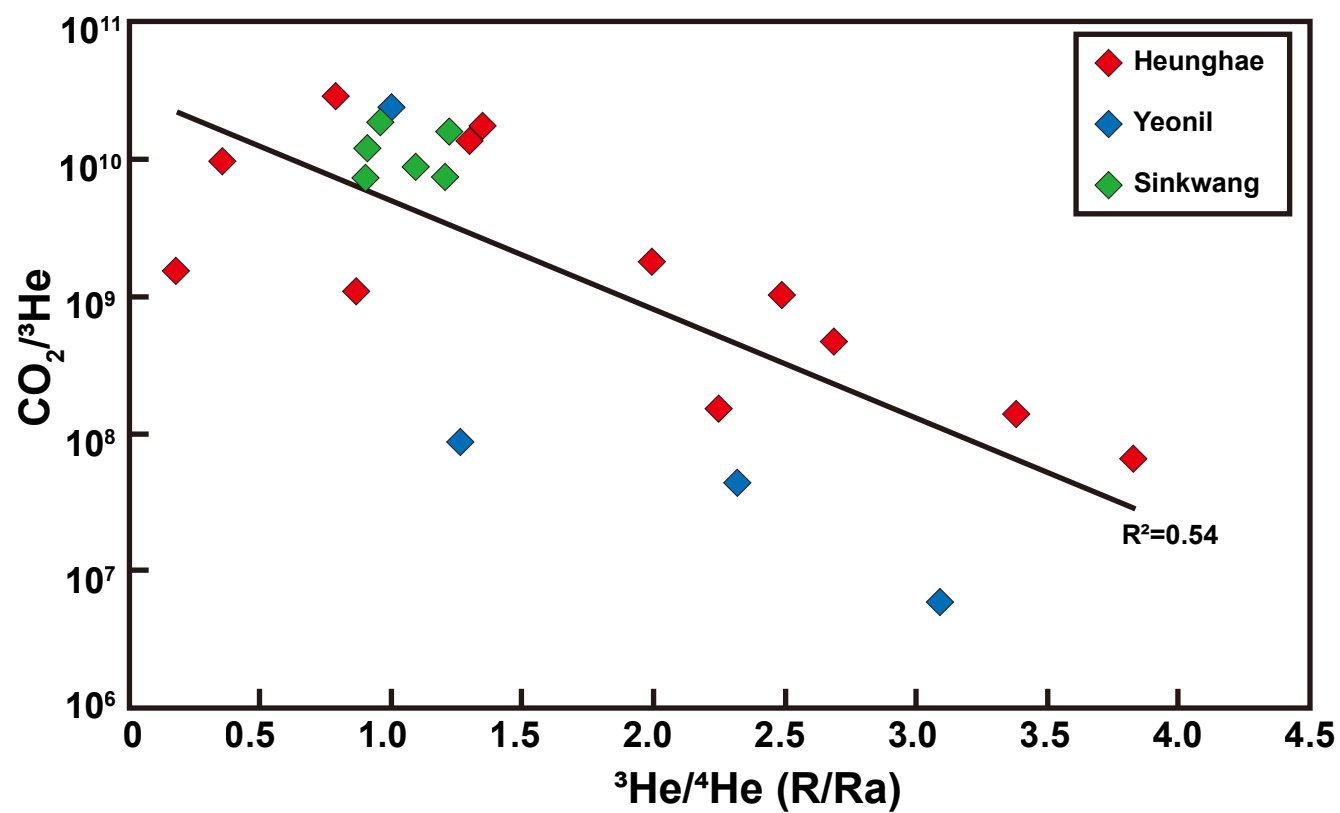

(f)  $\text{CO}_2/^3\text{He}$  and  $^3\text{He}/^4\text{He}$  ratio plot.



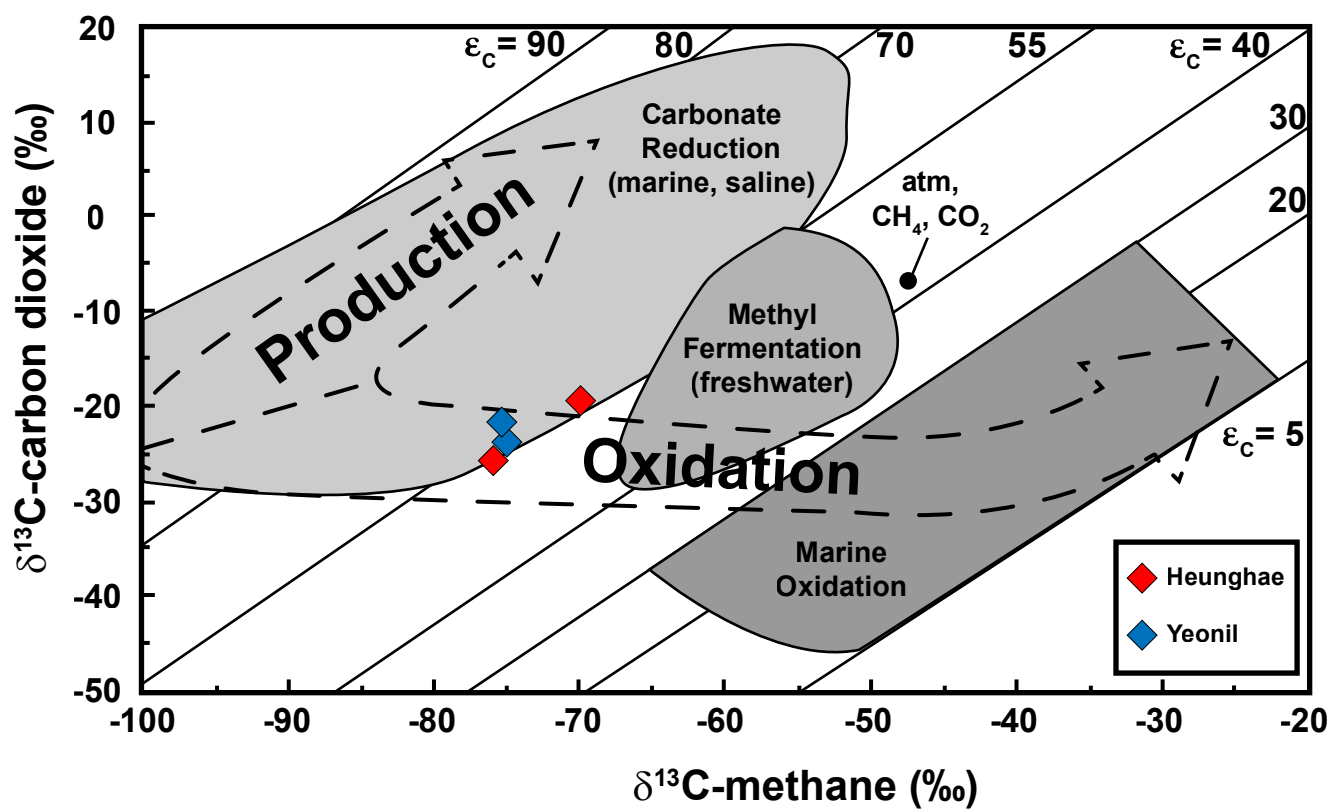

(b)  $\delta^{13}\text{C}$  of  $\text{CO}_2$  and  $\delta^{13}\text{C}$  of  $\text{CH}_4$  plot (modified from Whiticar [34]).

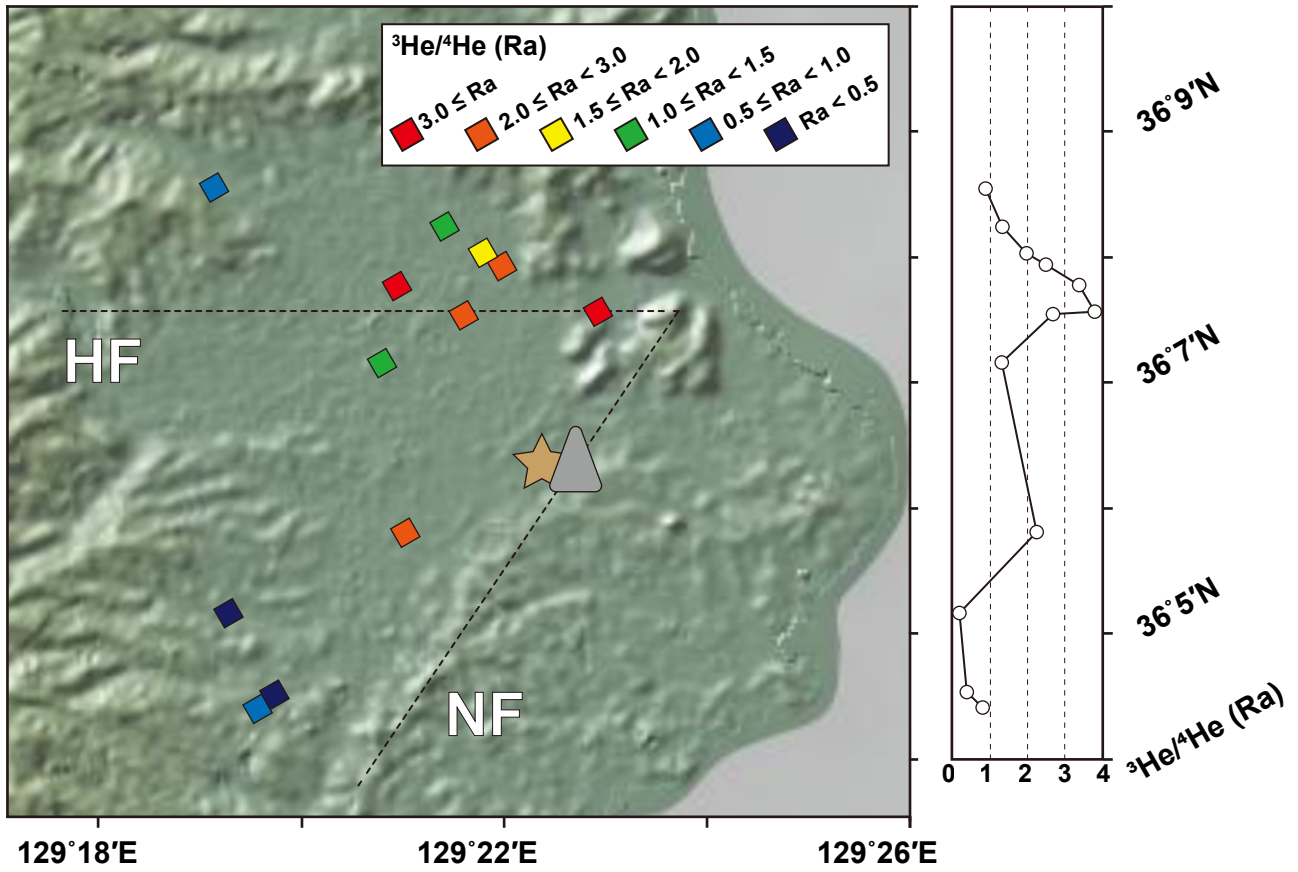

Figure S3: Helium samples from the Heunghae area (diamond symbol) and the helium isotope and latitude plot. Each symbol is colored by its helium isotope ratio ( $^3\text{He}/^4\text{He}$ ). The locations of Heunghae (HF) and Namsong (NF) fault lines (dashed line) are described in Section 4.4. The gray triangle indicates the location of the EGS site, and the brown star indicates the location of the  $M_w$  5.5 earthquake.

| ID       | Region     | $\delta^{15}\text{N}$ | $\text{N}_2/{}^3\text{He}$ | fm   | fs       | fa    |
|----------|------------|-----------------------|----------------------------|------|----------|-------|
|          |            | $\text{N}_2$          |                            | MORB | Sediment | Air   |
| P-11     | Heunghae   | 2.15                  | 6.7 E+10                   | 0.0% | 30.7%    | 69.3% |
| P-12     |            | 3.15                  | 1.5 E+09                   | 0.1% | 45.0%    | 54.9% |
| P-14     |            | 3.16                  | 9.6 E+08                   | 0.1% | 45.2%    | 54.7% |
| DS-1     |            | 2.43                  | 3.6 E+09                   | 0.0% | 34.7%    | 65.2% |
| PH19-01  |            | 3.12                  | 8.5 E+10                   | 0.0% | 44.6%    | 55.4% |
| PH19-03  |            | 2.62                  | 3.9 E+10                   | 0.0% | 37.4%    | 62.6% |
| PH19-04  |            | 2.42                  | 1.2 E+10                   | 0.0% | 34.6%    | 65.4% |
| PH19-05  |            | 0.96                  | 3.3 E+09                   | 0.0% | 13.7%    | 86.2% |
| PH19-06  |            | 1.8                   | 5.7 E+08                   | 0.2% | 25.8%    | 74.0% |
| PH19-10  |            | 1.78                  | 9.2 E+10                   | 0.0% | 25.4%    | 74.6% |
| PH19-11  |            | 1.25                  | 6.8 E+10                   | 0.0% | 17.9%    | 82.1% |
| PH19-12  |            | 1.57                  | 4.1 E+08                   | 0.2% | 22.6%    | 77.2% |
| PH19-07  | Yeonil     | 1.26                  | 9.3 E+07                   | 1.0% | 18.7%    | 80.4% |
| PH19-08  |            | 0.19                  | 4.7 E+08                   | 0.2% | 2.8%     | 97.0% |
| PH19-09  |            | 2.06                  | 1.5 E+11                   | 0.0% | 29.4%    | 70.6% |
| PH-3     |            | 0.33                  | 8.2 E+10                   | 0.0% | 4.7%     | 95.3% |
| P-2      | Sinkwang   | 1.44                  | 8.0 E+10                   | 0.0% | 20.6%    | 79.4% |
| P-3      |            | 3.56                  | 7.0 E+10                   | 0.0% | 50.9%    | 49.1% |
| P-4      |            | 1.21                  | 8.9 E+10                   | 0.0% | 17.3%    | 82.7% |
| P-5      |            | 3.07                  | 2.4 E+10                   | 0.0% | 43.9%    | 56.1% |
| P-7      |            | 1.91                  | 4.9 E+10                   | 0.0% | 27.3%    | 72.7% |
| Mantle   | Endmembers | -5                    | 8.9 E+05                   | 100% | 0%       | 0%    |
| Sediment |            | 7                     | 1.4 E+12                   | 0%   | 100%     | 0%    |
| Air      |            | 0                     | 1.1 E+11                   | 0%   | 0%       | 100%  |

Table S1:  $\delta^{15}\text{N}$ ,  $\text{N}_2/{}^3\text{He}$ , and the contribution of three nitrogen endmembers on the Pohang samples: the mantle, sediment, and the air. The  $\delta^{15}\text{N}$  and  $\text{N}_2/{}^3\text{He}$  of each endmember and the mixing model are described in Section 4.2.

| Sample name | Rc/Ra | [He] <sub>F.m</sub><br>(ccSTP g <sup>-1</sup> ) | Helium flow rate (mm a <sup>-1</sup> ) |        |       |       | <sup>3</sup> He flux (atoms cm <sup>-2</sup> sec <sup>-1</sup> ) |           |           |           |
|-------------|-------|-------------------------------------------------|----------------------------------------|--------|-------|-------|------------------------------------------------------------------|-----------|-----------|-----------|
|             |       |                                                 | Φ=0.01                                 | Φ=0.05 | Φ=0.1 | Φ=0.2 | Φ=0.01                                                           | Φ=0.05    | Φ=0.1     | Φ=0.2     |
| P-12        | 3.92  | 9.34E-07                                        | 1279.9                                 | 1279.9 | 606.3 | 269.5 | 3.02 E+03                                                        | 5.80 E+02 | 2.75 E+02 | 1.22 E+02 |
| PH19-12     | 2.26  | 1.92E-06                                        | 253.7                                  | 253.7  | 120.2 | 53.4  | 1.28 E+03                                                        | 2.44 E+02 | 1.16 E+02 | 5.15 E+01 |
| PH19-07     | 3.09  | 4.11E-06                                        | 190.2                                  | 190.2  | 90.1  | 40    | 2.05 E+03                                                        | 3.93 E+02 | 1.87 E+02 | 8.21 E+01 |

Table S2: The corrected Helium isotope ratio, the concentration of helium in original mantle fluid, the helium flow rate, and the <sup>3</sup>He flux of each fault system.

| Fault name | Sampling site | Distance | <sup>4</sup> He | Corrected <sup>3</sup> He/ <sup>4</sup> He | <sup>3</sup> He flux                        |
|------------|---------------|----------|-----------------|--------------------------------------------|---------------------------------------------|
|            |               | km       | ccSTP/g         | Ra                                         | (atoms cm <sup>-2</sup> sec <sup>-1</sup> ) |
| Futagawa   | Ajisai        | -5.0     | 1.37 E-07       | 1.604                                      | 1.3E+03                                     |
|            | Mifune        | -2.7     | 8.36 E-06       | 1.790                                      | 1.5E+03                                     |
|            | Otsu          | 2.2      | 1.60 E-05       | 4.184                                      | 5.6 E+03                                    |
|            | Kikuchi       | 23.0     | 1.10 E-05       | 1.215                                      | 9.1 E+02                                    |
|            | Ueki          | 25.1     | 1.08 E-05       | 1.627                                      | 1.3 E+03                                    |
|            | Tamana        | 30.8     | 1.88 E-06       | 0.584                                      | 4.0 E+02                                    |
|            | Hirayama      | 40.0     | 1.53 E-05       | 0.626                                      | 4.3 E+02                                    |
| Heunghae   | DS-1          | -1.9     | 1.65 E-07       | 0.791                                      | 3.9 E+02                                    |
|            | PH19-03       | -1.3     | 8.59 E-08       | 2.552                                      | 8.0 E+02                                    |
|            | PH19-04       | -0.9     | 2.99 E-07       | 2.121                                      | 1.1 E+03                                    |
|            | PH19-05       | -0.7     | 1.32 E-06       | 2.540                                      | 1.5 E+03                                    |
|            | PH19-06       | -0.4     | 1.75 E-06       | 3.452                                      | 2.4 E+03                                    |
|            | P-12          | 0.0      | 1.91 E-06       | 3.922                                      | 3.0 E+03                                    |
|            | P-14          | 0.0      | 2.66 E-06       | 2.709                                      | 1.7 E+03                                    |
|            | PH19-01       | 0.8      | 2.04 E-07       | 1.384                                      | 6.4 E+02                                    |

Table S3: The <sup>4</sup>He concentration, corrected <sup>3</sup>He/<sup>4</sup>He ratio, and <sup>3</sup>He flux of each sample and their distance from related faults, respectively. The data of the Futagawa fault is from Sano et al. [6].
